# Supplementary material for: Associations between the inflammatory potential of diets with adherence to plant-based dietary patterns and the risk of new-onset cardiometabolic diseases in Chinese adults: findings from a nation-wide prospective cohort study
Source: Royal Society of Chemistry journal article supplement (doi:10.1039/d3fo02579a), 2023-01-01
Supplement: d3fo02579a1.pdf [file d3fo02579a1.pdf]

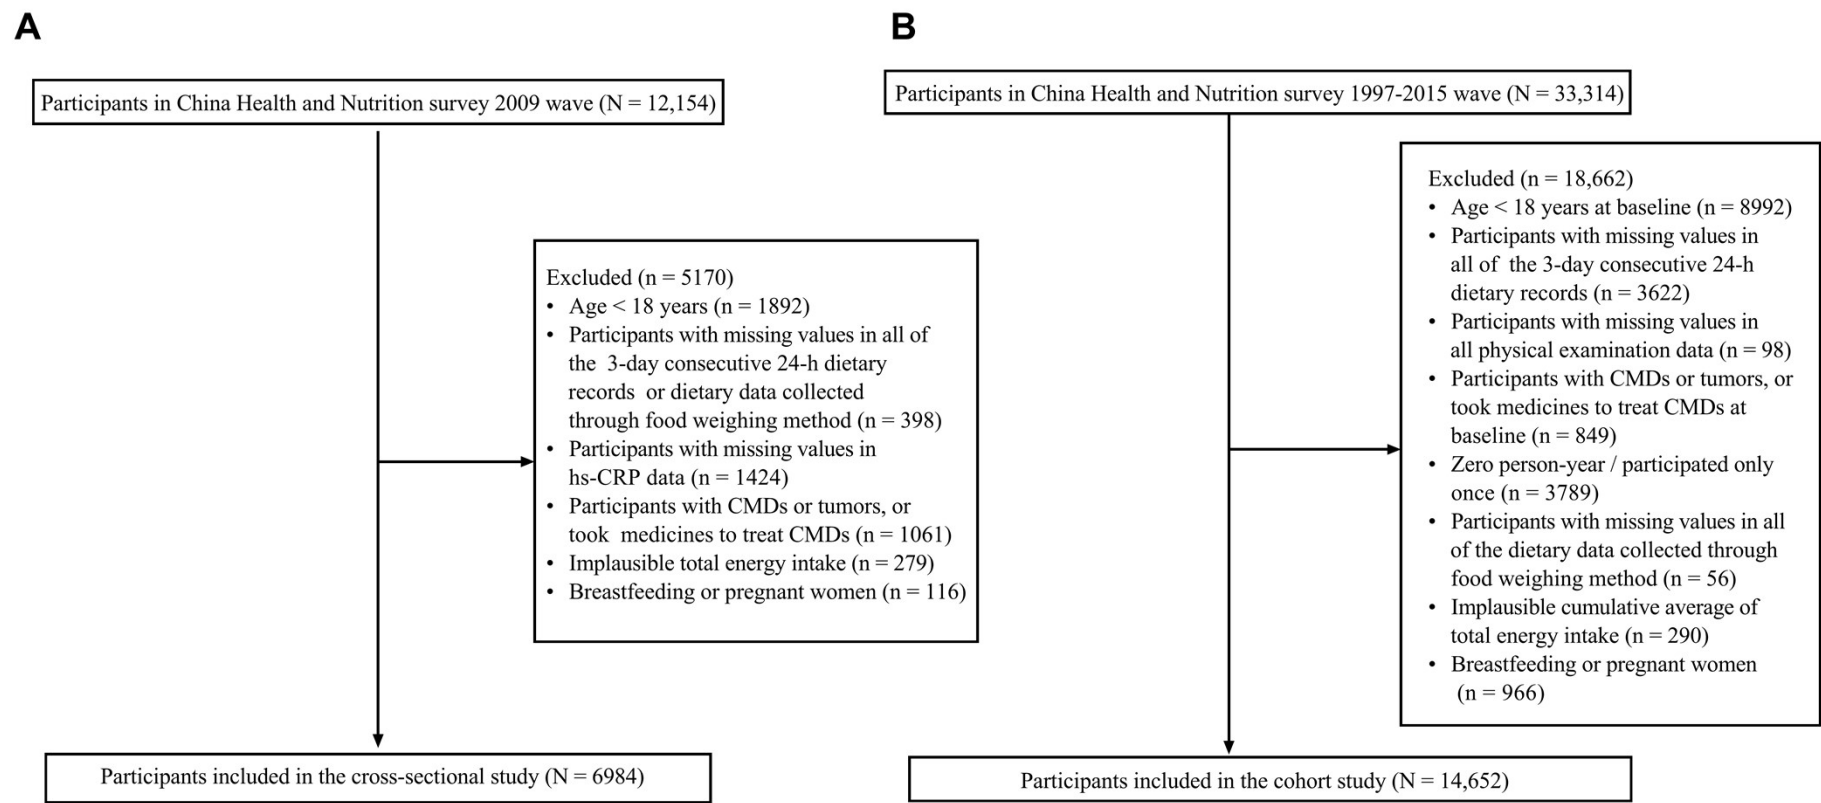

**Supplemental Fig. 1** Participant flow diagram in China Health and Nutrition survey 2009 wave (A) and 1997-2015 wave (B).

Abbreviations: CMDs, cardiometabolic diseases; hs-CRP, high-sensitivity C-reactive protein.

**Supplemental Table 1** Scoring criteria for each plant-based dietary index and food items of each food group <sup>a</sup>.

|                           |                                                                                                                                                                    | PDI | hPDI | uPDI |
|---------------------------|--------------------------------------------------------------------------------------------------------------------------------------------------------------------|-----|------|------|
| Plant Food Groups         |                                                                                                                                                                    |     |      |      |
| Healthy                   |                                                                                                                                                                    |     |      |      |
| Whole grains              | Wheat, wheat germ, bran, black rice, brown rice, corn, barley, millet, yellow rice, cereal, oatmeal, other grains                                                  | +   | +    | -    |
| Fruits                    | kernel and stone fruits, berry fruit, citrus, tropical and subtropical fruits, melons                                                                              | +   | +    | -    |
| Vegetables                | Root vegetables, fresh beans, eggplant, garlic and onion, young stems and leaves, aquatic vegetables, yams or sweet potatoes, wild vegetables, mushrooms and algae | +   | +    | -    |
| Nuts                      | Peanuts and nuts                                                                                                                                                   | +   | +    | -    |
| Legumes                   | String beans, tofu or soybeans, beans or lentils, peas or lima beans                                                                                               | +   | +    | -    |
| Vegetable oils            | Vegetable oil used for cooking                                                                                                                                     | +   | +    | -    |
| Tea and coffee            | Tea, coffee                                                                                                                                                        | +   | +    | -    |
| Less healthy              |                                                                                                                                                                    |     |      |      |
| Fruit juices              | Orange juice, lemon juice, plum juice, other juices                                                                                                                | +   | -    | +    |
| Refined grains            | Noodles, white rice, bread, biscuits, and other leisure foods, flour, instant noodles, pancakes, steamed buns, dumplings, rice cake                                | +   | -    | +    |
| Potatoes and starch       | Potatoes, chips, starch                                                                                                                                            | +   | -    | +    |
| Sugar sweetened beverages | Carbonated beverages, solid beverages, milk beverages, plant protein beverages, other beverages.                                                                   | +   | -    | +    |
| Sweets and desserts       | Cakes, desserts, mooncakes, sugars, preserves, jams                                                                                                                | +   | -    | +    |
| Animal Food Groups        |                                                                                                                                                                    |     |      |      |
| Animal fat                | lard, butter or mutton tallow                                                                                                                                      | -   | -    | -    |
| Dairy                     | Milk, yogurt, ice cream, cheese                                                                                                                                    | -   | -    | -    |

|                 |                                                                                        |   |   |   |
|-----------------|----------------------------------------------------------------------------------------|---|---|---|
| Eggs            | Eggs                                                                                   | - | - | - |
| Fish or seafood | Fish, shrimp, crab, shellfish and molluscs                                             | - | - | - |
| Meat            | Pork, beef, mutton or lamb, other red meat, processed meats, chicken and other poultry | - | - | - |

---

<sup>a</sup> All food groups intakes were adjusted for total energy intake by the regression residual method <sup>1</sup> and each food group was ranked by quintiles to assign a “+” or a “-” score. “+” indicates that a maximum score of 5 assigned to individual intakes in the highest quintile and a minimum score of 1 assigned to individual intakes in the lowest quintile. “-” indicates that a minimum score of 1 assigned to individual intakes in the highest quintile and a maximum score of 5 assigned to individual intakes in the lowest quintile. Abbreviations: hPDI, healthy plant-based dietary index; PDI, overall plant-based dietary index; uPDI, unhealthy plant-based dietary index.

**Supplemental Table 2** Scoring criteria for ERD and food items of each food group.

| Food groups <sup>a</sup>                          | Scoring criteria                                |                                     |
|---------------------------------------------------|-------------------------------------------------|-------------------------------------|
|                                                   | 0 point                                         | 1 point                             |
| <b>Whole grains</b>                               |                                                 |                                     |
| Rice, wheat, corn and others                      | >464 g/d or ≤464 g/d and whole grain fiber ≤5 g | ≤464 g/d and whole grain fiber >5 g |
| <b>Tubers or starchy vegetables</b>               |                                                 |                                     |
| Potatoes and cassava                              | >100 g/d                                        | ≤100 g/d                            |
| <b>Vegetables</b>                                 |                                                 |                                     |
| All vegetables                                    | <200 g/d or >600 g/d                            | 200-600 g/d                         |
| <b>Fruits</b>                                     |                                                 |                                     |
| All fruits                                        | <100 g/d or >300 g/d                            | 100-300 g/d                         |
| <b>Dairy foods</b>                                |                                                 |                                     |
| Whole milk or derivative equivalents (eg, cheese) | >500 g/d                                        | ≤500 g/d                            |
| <b>Protein sources</b>                            |                                                 |                                     |
| Beef, mutton, lamb and pork                       | >28 g/d                                         | ≤28 g/d                             |
| Chicken and other poultry                         | >58 g/d                                         | ≤58 g/d                             |
| Eggs                                              | >25 g/d                                         | ≤25 g/d                             |
| Fish                                              | >100 g/d                                        | ≤100 g/d                            |
| Legumes <sup>b</sup>                              | >150 g/d                                        | ≤150 g/d                            |
| Nuts                                              | >75 g/d                                         | ≤75 g/d                             |
| <b>Added fats</b>                                 |                                                 |                                     |
| Unsaturated oils                                  | <20 g/d or >80 g/d                              | 20–80 g/d                           |
| Saturated oils                                    | >11.8 g/d                                       | ≤11.8 g/d                           |
| <b>Added sugars</b>                               |                                                 |                                     |
| All sugars                                        | >31 g/d                                         | ≤31 g/d                             |

<sup>a</sup> Food groups are directly taken from the "Summary Report of the EAT-Lancet Commission" <sup>2</sup>. <sup>b</sup> Legumes including dry beans, lentils, peas and soy

foods. Abbreviations: ERD, EAT-Lancet diet score.

**Supplemental Table 3** Scoring criteria for WISH and food items of each food group.

| Food groups <sup>a</sup>  | Recommended Intake in<br>g/d (Lower and Upper<br>Range of Intake) | Scoring criteria <sup>b</sup> |                                                                                                                  |         |                                                                                                                  |
|---------------------------|-------------------------------------------------------------------|-------------------------------|------------------------------------------------------------------------------------------------------------------|---------|------------------------------------------------------------------------------------------------------------------|
|                           |                                                                   | 0                             | $10 \times \frac{\text{reported intake} - \text{lower intake}}{\text{recommended intake} - \text{lower intake}}$ | 10      | $10 \times \frac{\text{upper intake} - \text{reported intake}}{\text{upper intake} - \text{recommended intake}}$ |
| Whole grains              | ≥125 (100–150)                                                    | <100                          | 100-125                                                                                                          | ≥125    |                                                                                                                  |
| Vegetables                | 300 (200–600)                                                     | <200                          | 200-300                                                                                                          | ≥300    |                                                                                                                  |
| Fruits                    | 200 (100–300)                                                     | <100                          | 100-200                                                                                                          | ≥200    |                                                                                                                  |
| Legumes                   | 75 (0–100)                                                        | 0                             | 0-75                                                                                                             | ≥75     |                                                                                                                  |
| Dairy foods               | 250 (0–500)                                                       | >500                          | 0-250                                                                                                            | 250-500 |                                                                                                                  |
| Fish                      | 28 (0–100)                                                        | >100                          | 0-28                                                                                                             | 28-100  |                                                                                                                  |
| Nuts                      | 50 (0–75)                                                         | >75                           | 0-50                                                                                                             | 50-75   |                                                                                                                  |
| Red meat                  | 14 (0–28)                                                         | >28                           |                                                                                                                  | 0-14    | 14-28                                                                                                            |
| Eggs                      | 13 (0–25)                                                         | >13                           |                                                                                                                  | 0-13    | 13-25                                                                                                            |
| Chicken and other poultry | 29 (0–58)                                                         | >29                           |                                                                                                                  | 0-29    | 29-58                                                                                                            |
| Unsaturated oils          | 40 (20–80)                                                        | <20 or >80                    | 20-40                                                                                                            | 40-80   |                                                                                                                  |
| Saturated oils            | 11.8 (0–11.8)                                                     | >11.8                         |                                                                                                                  | 0-11.8  |                                                                                                                  |
| Added sugars              | 31 (0–31)                                                         | >31                           |                                                                                                                  | 0-31    |                                                                                                                  |

<sup>a</sup> Food groups are consistent with the "Summary Report of the EAT-Lancet Commission" <sup>2</sup>. <sup>b</sup> Reported intake indicates that actual intake. Abbreviations: WISH, World Index for Sustainability and Health.

**Supplemental Table 4** Scoring criteria for PHDI and food items of each food group.

| Food groups                  | Scoring criteria (points) <sup>a</sup> |      |       |      |       |
|------------------------------|----------------------------------------|------|-------|------|-------|
|                              | 0                                      | 5    | 10    | 5    | 0     |
| Nuts and peanuts             | 0                                      |      | ≥11.5 |      |       |
| Legumes                      | 0                                      |      | ≥11.3 |      |       |
| Fruits                       | 0                                      |      | ≥5.0  |      |       |
| Vegetables                   | 0                                      |      | ≥3.1  |      |       |
| Whole cereals                | 0                                      |      | ≥32.4 |      |       |
| Eggs                         | 0                                      |      | 0.8   |      | ≥1.5  |
| Fish and seafood             | 0                                      |      | 1.6   |      | ≥5.7  |
| Tubers and potatoes          | 0                                      |      | 1.6   |      | ≥3.1  |
| Dairy                        | 0                                      |      | 6.1   |      | ≥12.2 |
| Vegetable oils               | 0                                      |      | 16.5  |      | ≥30.7 |
| DGV/total ratio <sup>b</sup> | 0                                      | 29.5 |       | 29.5 | 100   |
| ReV/total ratio <sup>c</sup> | 0                                      | 38.5 |       | 38.5 | 100   |
| Red meat                     | ≥2.4                                   |      | 0     |      |       |
| Chicken and substitutes      | ≥5.0                                   |      | 0     |      |       |
| Animal fats                  | ≥1.4                                   |      | 0     |      |       |
| Added sugars                 | ≥4.8                                   |      | 0     |      |       |

<sup>a</sup> All point values expressed as caloric densities from the reference diet proposed by the EAT-Lancet Commission <sup>2</sup>. <sup>b</sup> Ratio between the energy intake of dark green vegetables (numerator) and the total of vegetables (denominator). <sup>c</sup> Ratio between the energy intake of the red and orange vegetables (numerator) and the total of vegetables (denominator). Abbreviations: PHDI, Planetary Health Diet Index.

## References

1. W. C. Willett, G. R. Howe and L. H. Kushi, Adjustment for total energy intake in epidemiologic studies, *Am J Clin Nutr*, 1997, **65**, 1220S-1228S; discussion 1229S-1231S.
2. W. Willett, J. Rockström, B. Loken, M. Springmann, T. Lang, S. Vermeulen, T. Garnett, D. Tilman, F. DeClerck, A. Wood, M. Jonell, M. Clark, L. J. Gordon, J. Fanzo, C. Hawkes, R. Zurayk, J. A. Rivera, W. De Vries, L. Majele Sibanda, A. Afshin, A. Chaudhary, M. Herrero, R. Agustina, F. Branca, A. Lartey, S. Fan, B. Crona, E. Fox, V. Bignet, M. Troell, T. Lindahl, S. Singh, S. E. Cornell, K. Srinath Reddy, S. Narain, S. Nishtar and C. J. L. Murray, Food in the Anthropocene: the EAT-Lancet Commission on healthy diets from sustainable food systems, *Lancet*, 2019, **393**, 447-492.
